# Supplementary material for: Effect of Compressive Prestrain on the Anti-Pressure and Anti-Wear Performance of Monolayer MoS2: A Molecular Dynamics Study
Source: PubMed Central journal article supplement (PMC7075122; doi:10.3390/nano10020275), 2020-02-06
Supplement: nanomaterials-10-00275-s001.pdf [file nanomaterials-10-00275-s001.pdf]

Supplementary

# Effect of Compressive Prestrain on the Anti-Pressure and Anti-Wear Performance of Monolayer MoS<sub>2</sub>: A Molecular Dynamics Study

Ning Kong <sup>1,\*</sup>, Boyu Wei <sup>1</sup>, Yuan Zhuang <sup>2</sup>, Jie Zhang <sup>1</sup>, Hongbo Li <sup>1</sup>, and Bo Wang <sup>2</sup>

<sup>1</sup> School of Mechanical Engineering, University of Science and Technology Beijing, Beijing 100083, China; g20188554@xs.ustb.edu.cn (B.W.); ZhangJie@ustb.edu.cn (J.Z.); lihongbo@ustb.edu.cn (H.L.)

<sup>2</sup> Beijing Institute of Spacecraft System Engineering, Beijing 100094, China; zyuan8707@163.com (Y.Z.); wb861226@126.com (B.W.)

\* Correspondence: kongning@ustb.edu.cn

Received: 02 January 2020; Accepted: 03 February 2020; Published: 06 February 2020

## 1. Thermostatting Scheme

(a) Part NVT

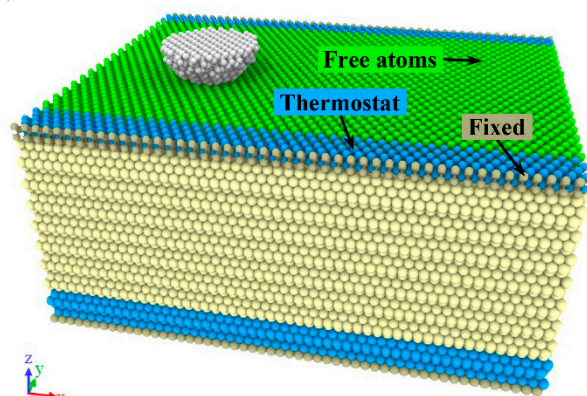

(b) All NVT

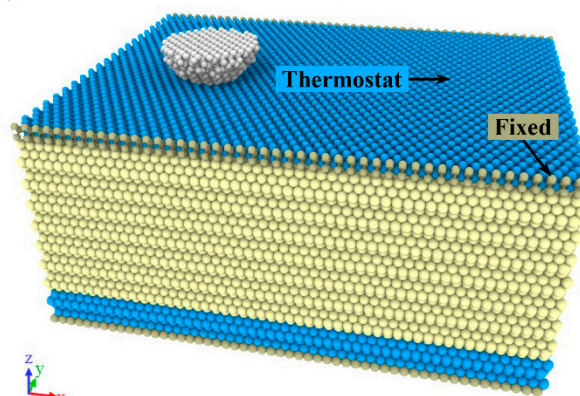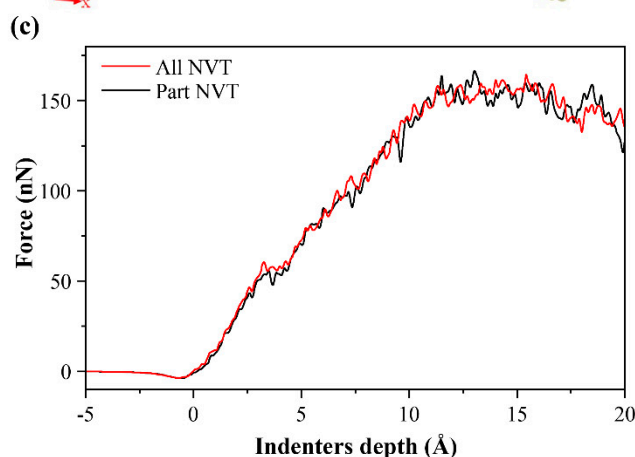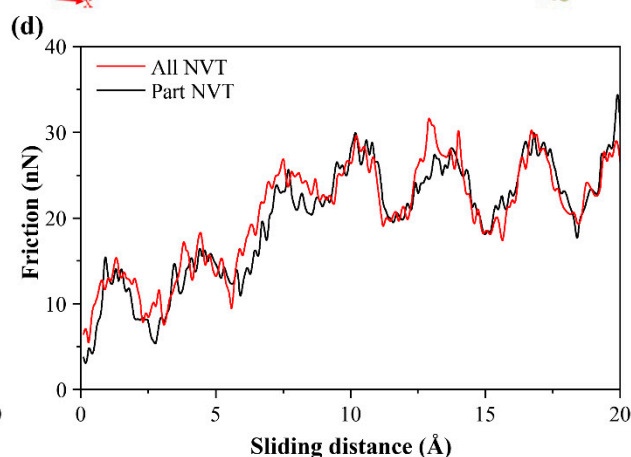

**Figure S1.** Schematic of two thermostat schemes: (a) Part NVT: the Langevin thermostat is only applied to the MoS<sub>2</sub> atoms close to the fixed region. (b) All NVT: the Langevin thermostat is applied to all free atoms from the MoS<sub>2</sub> layer. Part NVT is adopted in this work. For both schemes, the thermostatting regions in the Pt substrate are the same as that in the main manuscript. (c) The force-depth relations of the MoS<sub>2</sub>/Pt substrate during nano-indentation process using Part NVT and All

NVT. (d) The friction-distance curves of the MoS<sub>2</sub>/Pt substrate during nano-scratch process using Part NVT and All NVT.

## 2. Indenting Points and Scanning Lines

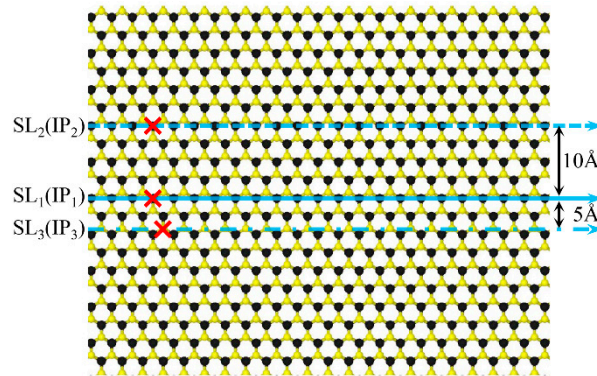

**Figure S2.** Schematic of indenting points (IP) and scanning lines (SL) on the MoS<sub>2</sub>. Each scanning line passes through a corresponding indenting point, which is indicated by red cross.
